# Supplementary material for: Self-supporting FeCoMoP nanosheets for efficient overall water splitting
Source: Royal Society of Chemistry journal article supplement (doi:10.1039/d3nj05592b), 2024-01-01
Supplement: d3nj05592b1.pdf [file d3nj05592b1.pdf]

## Self-supporting FeCoMoP nanosheets for efficient overall water splitting

Hongxi Xiong<sup>a,b</sup>, Shuihua Tang<sup>a,b,\*</sup>, Mingjie Xu<sup>a,b</sup>, Zelong Yu<sup>a,b</sup>, Yuhang Xie<sup>a,b</sup>, Shaoxiong Zhang<sup>c</sup>,  
Xiaohan Wang<sup>a,b</sup>, Yonglin Chen<sup>a,b</sup>, Lei Zhang<sup>a,d,\*\*</sup>

<sup>a</sup> State Key Lab of Oil and Gas Reservoir Geology & Exploitation, Southwest Petroleum University, Chengdu, 610500, PR China

<sup>b</sup> School of New Energy and Materials, Southwest Petroleum University, Chengdu, 610500, PR China

<sup>c</sup> Gathering and Transmission Technology Research Institute of Southwest Oil and gas field company of CNPC, Chengdu, 610000, PR China

<sup>d</sup> School of Chemistry and Chemical Engineering, Southwest Petroleum University, Chengdu, 610500, PR China

\* Corresponding author. Shuihua Tang, Tel: +86-2883032879, E-mail: [spraytang@hotmail.com](mailto:spraytang@hotmail.com);

Lei Zhang, Tel: +86-2883037334, E-mail: [zgc166929@aliyun.com](mailto:zgc166929@aliyun.com)

### Content:

**Fig. S1** SEM images of (a) CoMo(OH)<sub>x</sub> and (b) Fe-CoMo(OH)<sub>x</sub>.

**Fig. S2** (a) SEM image, (b) EDS spectrum, (c–g) elemental mappings of Co, Mo, P and O of Fe-CoMoP/NF.

**Fig. S3** (a) HER polarization curve (no iR compensated performed), (b) Histogram of overpotential at current densities of 10, 50, and 100 mA cm<sup>-2</sup> and (c) Tafel slope of Fe-CoMoP/NF at phosphating temperature of 300 °C and different cation exchange time. (d) HER polarization curve (no iR compensated performed), (e) Histogram of overpotential at current densities of 10, 50, and 100 mA cm<sup>-2</sup> and (f) Tafel slope of Fe-CoMoP/NF at different phosphatizing temperatures with cation exchange time of 24 h.

**Fig. S4** (a) OER polarization curve (no iR compensated performed), (b) Histogram of overpotential at current densities of 10, 50, and 100 mA cm<sup>-2</sup> and (c) Tafel slope of Fe-CoMoP/NF at phosphating temperature of 300 °C and different cation exchange time. (d) OER polarization curve (no iR compensated performed), (e) Histogram of overpotential at current densities of 10, 50, and 100 mA cm<sup>-2</sup> and (f) Tafel slope of Fe-CoMoP/NF at different phosphatizing temperatures with cation exchange time of 24 h.

**Fig. S5** (a–e) CV curves (f) C<sub>dl</sub> of CoP/NF, MoP/NF, CoMoP/NF, Fe-CoMo(OH)<sub>x</sub>/NF and Fe-CoMoP/NF, respectively.

**Fig. S6** Measure the change in the amounts of H<sub>2</sub> and O<sub>2</sub> gases released over time through theoretical models and experiments.

**Fig. S7** SEM images of Fe-CoMoP/NF after (a-b) HER and (b-c) OER duration test.

**Fig. S8** (a) XPS high-resolution spectra of (a) Co 2p, (b) Mo 2p, (c) Fe 3d and (d) P 2p of Fe-CoMoP/NF before and after HER/OER test.

**Table. S1** Atomic percentage of CoMoP measured by XPS.

**Table. S2** Atomic percentage of Fe-CoMoP measured by XPS.

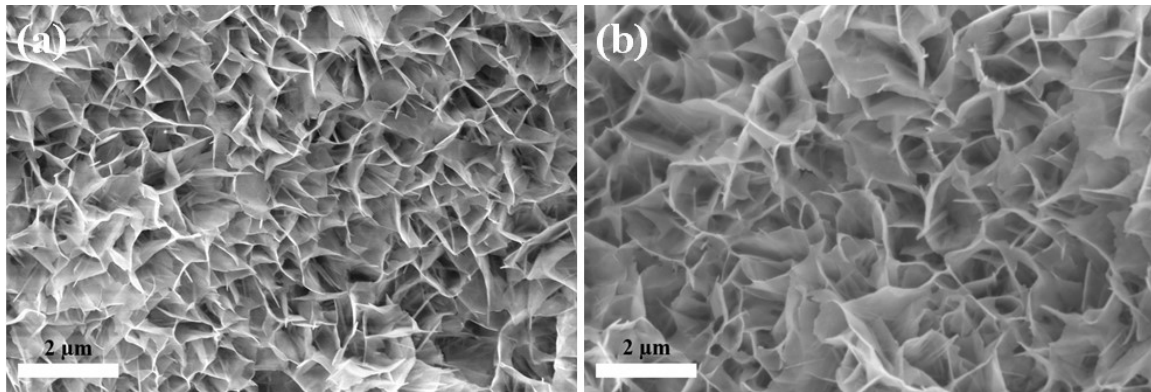

**Fig. S1** SEM images of (a) CoMo(OH)<sub>x</sub> and (b) Fe-CoMo(OH)<sub>x</sub>.

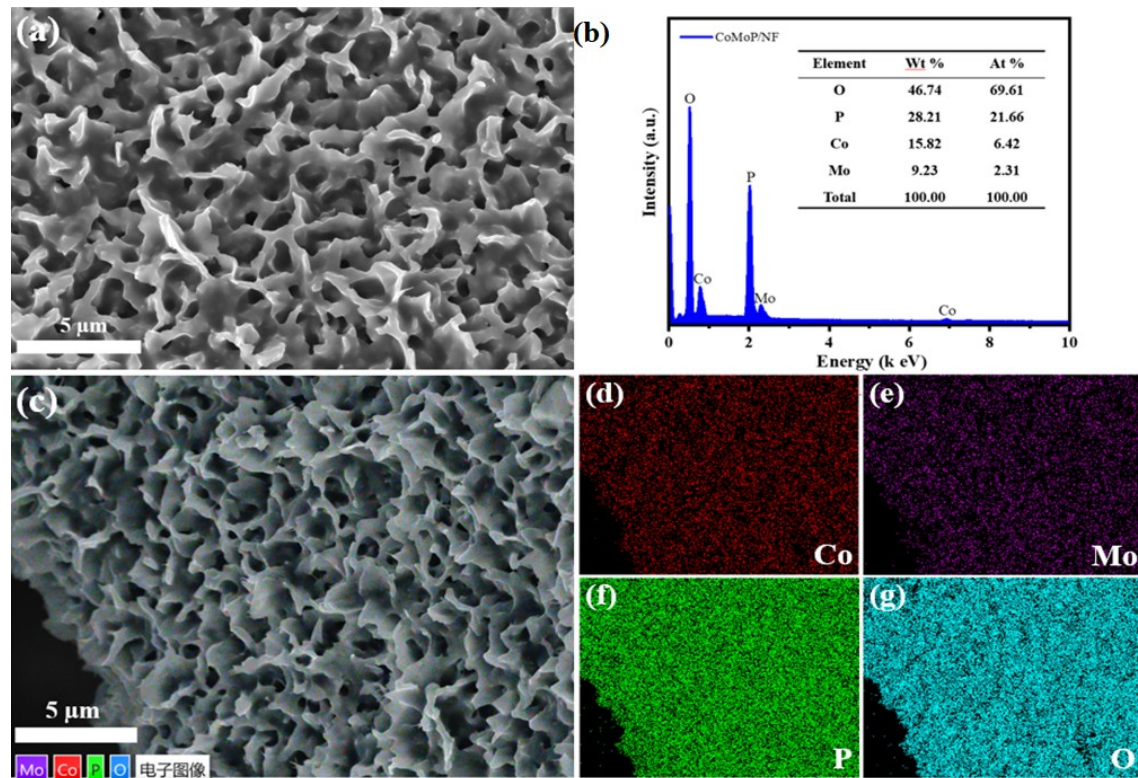

**Fig. S2** (a) SEM image, (b) EDS spectrum, (c–g) elemental mappings of Co, Mo, P and O of CoMoP/NF.

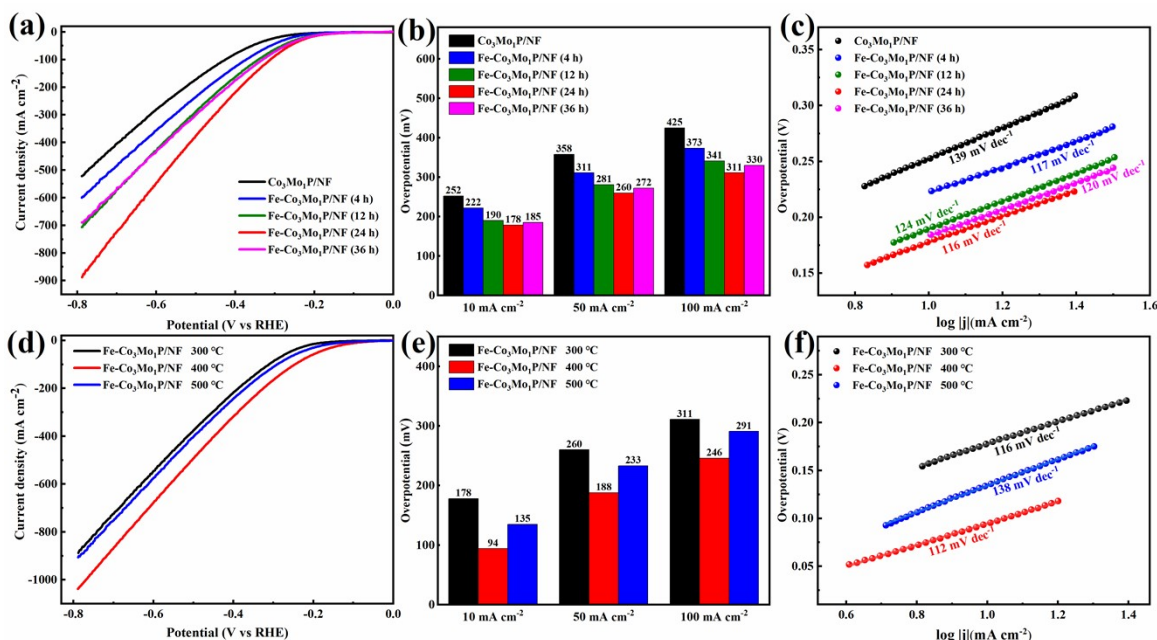

**Fig. S3** (a) HER polarization curve (no iR compensated performed), (b) Histogram of overpotential at current densities of 10, 50, and 100 mA cm<sup>-2</sup> and (c) Tafel slope of Fe-CoMoP/NF at phosphating temperature of 300°C and different cation exchange time. (d) HER polarization curve (no iR compensated performed), (e) Histogram of overpotential at current densities of 10, 50, and 100 mA cm<sup>-2</sup> and (f) Tafel slope of Fe-CoMoP/NF at different phosphating temperatures with cation exchange time of 24 h.

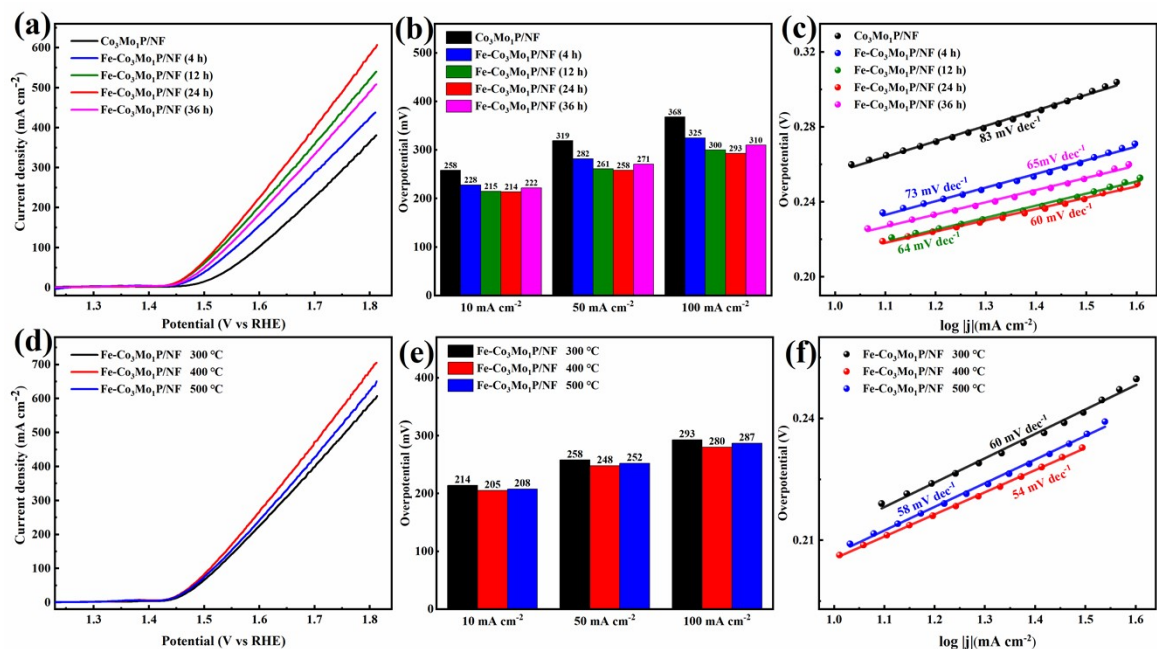

**Fig. S4** (a) OER polarization curve (no iR compensated performed), (b) Histogram of overpotential at current densities of 10, 50, and 100 mA cm<sup>-2</sup> and (c) Tafel slope of Fe-CoMoP/NF at phosphating temperature of 300°C and different cation exchange time. (d) OER polarization curve (no iR compensated performed), (e) Histogram of overpotential at current densities of 10, 50, and 100 mA cm<sup>-2</sup> and (f) Tafel slope of Fe-CoMoP/NF at different phosphating temperatures with cation exchange time

of 24 h.

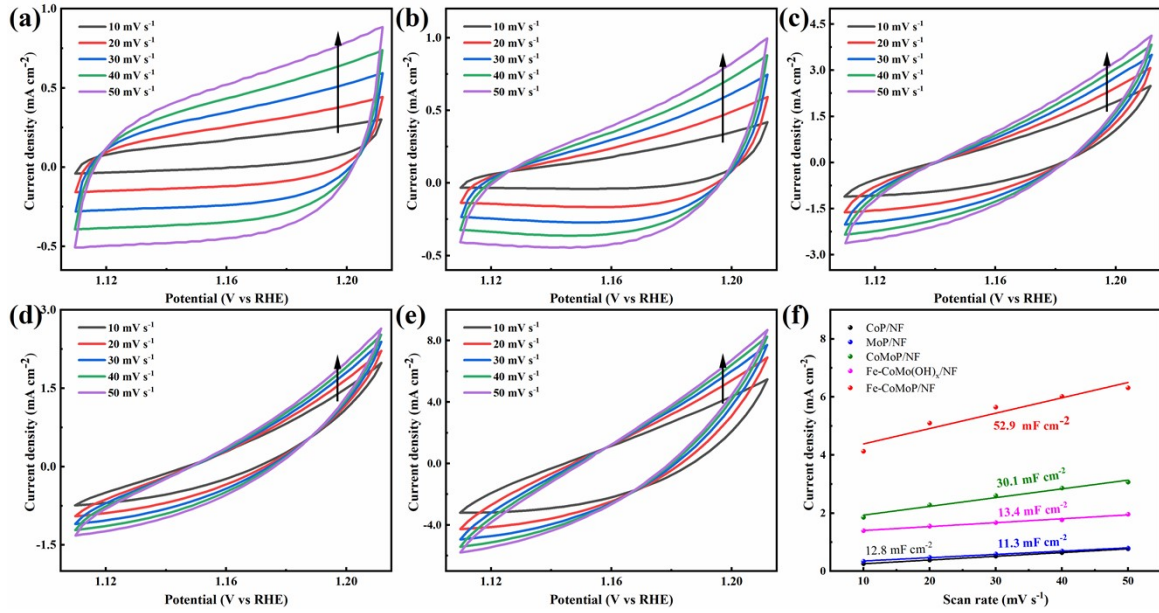

**Fig. S5** (a–e) CV curves (f)  $C_{dl}$  of CoP/NF, MoP/NF, CoMoP/NF, Fe-CoMo(OH)<sub>x</sub>/NF and Fe-CoMoP/NF, respectively.

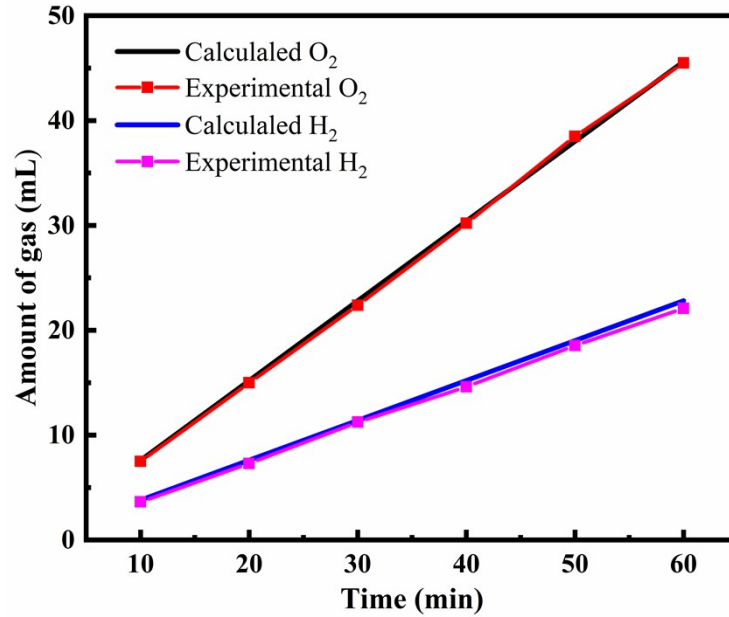

**Fig. S6** Measure the change in the amounts of H<sub>2</sub> and O<sub>2</sub> gases released over time through theoretical models and experiments.

The Faradaic efficiency (FE) was evaluated by the following equation:

$$Q = It \quad (1)$$

$$V_{theo} = \frac{RT}{nFp} Q \quad (2)$$

$$FE = \frac{V_{ex}}{V_{theo}} \% \quad (3)$$

Here,  $Q$  is the charge,  $I$  is the electrolysis current,  $t$  is the recording time,  $R$  is the ideal gas constant,  $T$

is the absolute temperature,  $n$  is the number of electrons required for a  $H_2$  and  $O_2$  molecule,  $F$  is Faraday's constant,  $p$  is the pressure,  $V_{ex}$  (mL) is the amount of evolved gas record,  $V_{theo}$  is the calculated volume by the equation.

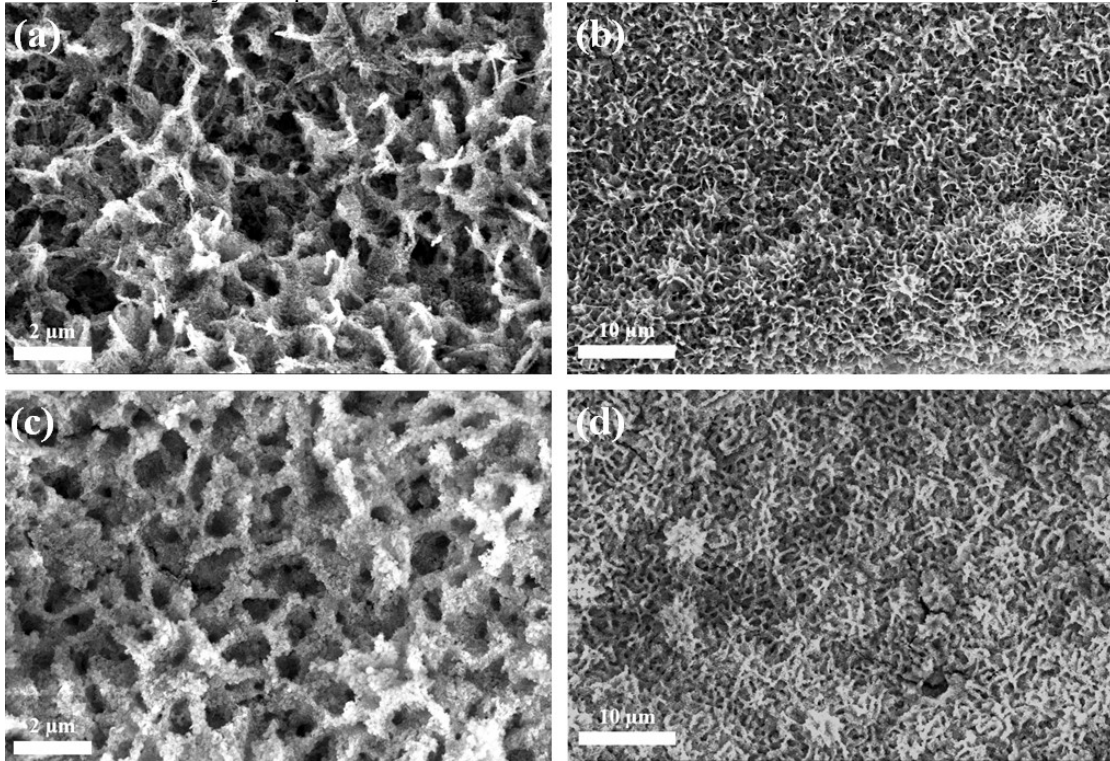

**Fig. S7** SEM images of Fe-CoMoP/NF after (a-b) HER and (b-c) OER duration test.

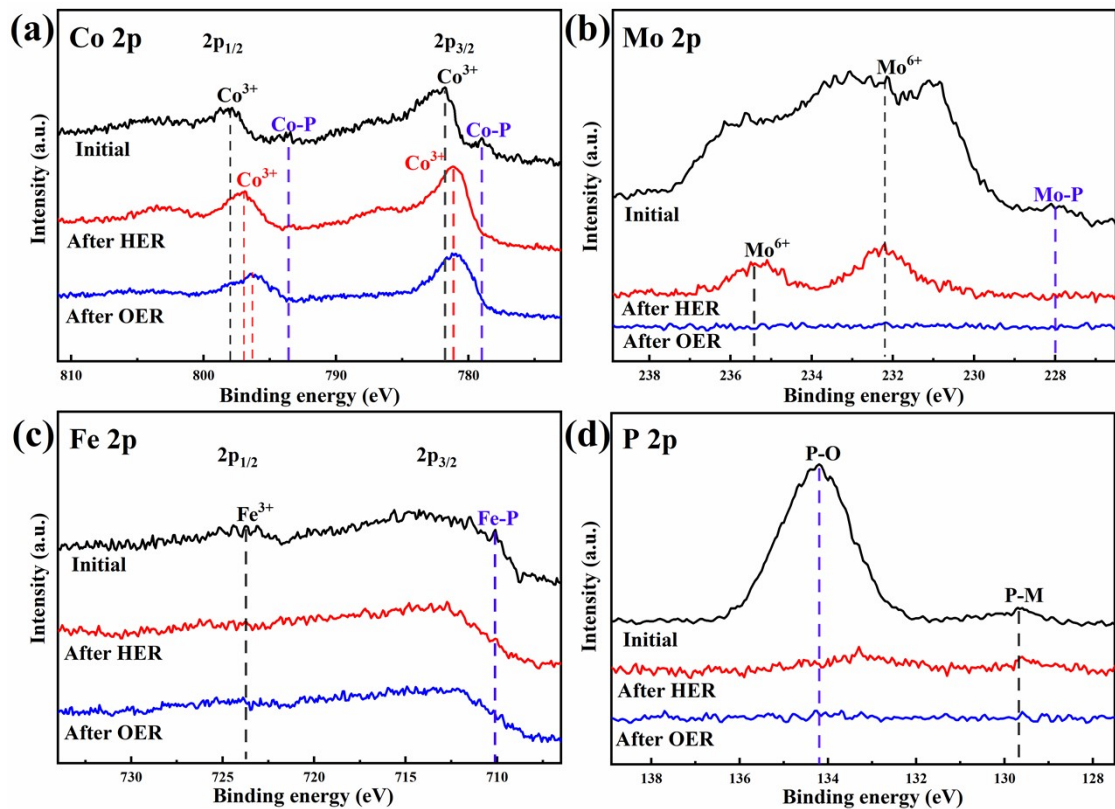

**Fig. S8** (a) XPS high-resolution spectra of (a) Co 2p, (b) Mo 2p, (c) Fe 3d and (d) P 2p of Fe-CoMoP/NF before and after HER/OER test.

**Table. S1** Atomic percentage of CoMoP measured by XPS.

| Table of element content |       |       |       |       |       |
|--------------------------|-------|-------|-------|-------|-------|
| element                  | C 1s  | O 1s  | P 2p  | Co 2p | Mo 3d |
| Atomic %                 | 14.96 | 57.77 | 17.52 | 7.3   | 2.45  |

**Table. S2** Atomic percentage of Fe-CoMoP measured by XPS.

| Table of element content |      |      |       |       |       |       |
|--------------------------|------|------|-------|-------|-------|-------|
| element                  | C 1s | O 1s | P 2p  | Fe 2p | Co 2p | Mo 3d |
| Atomic %                 | 18.1 | 54.7 | 17.26 | 2.87  | 4.87  | 2.2   |
